# Supplementary material for: Effects of social distancing on the spreading of COVID-19 inferred from mobile phone data
Source: PubMed Central journal article supplement (PMC7813880; doi:10.1038/s41598-021-81308-2), 2021-01-18
Supplement: 41598_2021_81308_MOESM1_ESM.pdf [file 41598_2021_81308_MOESM1_ESM.pdf]

# Effects of social distancing on the spreading of COVID-19 inferred from mobile phone data

Hamid Khataee<sup>1</sup>, Istvan Scheuring<sup>2,3</sup>, Andras Czirok<sup>4,5</sup>, and Zoltan Neufeld<sup>1,\*</sup>

<sup>1</sup>School of Mathematics and Physics, The University of Queensland, St. Lucia,  
Brisbane, QLD 4072, Australia

<sup>2</sup>Evolutionary Systems Research Group, Centre for Ecological Research, Tihany,  
8237, Hungary

<sup>3</sup>MTA-ELTE Theoretical Biology and Evolutionary Ecology Research Group,  
Eotvos University, Budapest, Hungary

<sup>4</sup>Department of Biological Physics, Eotvos University, Budapest, 1053, Hungary

<sup>5</sup>Department of Anatomy and Cell Biology, University of Kansas Medical Center,  
Kansas City, KS 66160, USA

\*Corresponding author: z.neufeld@uq.edu.au

December 2, 2020

# 1 Supplemental Material

Table S1: Calendar dates associated with the daily deaths and mobility data.

| Country | Time 0   | $t_{\text{NL}}$ | $t_{\text{eff}}$ |
|---------|----------|-----------------|------------------|
| ITA     | March 3  | March 12        | March 3          |
| ESP     | March 11 | March 14        | March 11         |
| FRA     | March 12 | March 17        | March 13         |
| GBR     | March 16 | March 23        | March 15         |
| GER     | March 20 | March 23        | March 12         |
| BEL     | March 22 | March 17        | March 11         |
| NLD     | March 18 | March 23        | March 11         |
| SWL     | March 21 | March 13        | March 11         |
| SWE     | March 27 | -               | March 10         |

Time 0: the day when a country first reported  $\geq 5$  daily deaths.  $t_{\text{NL}}$ : national lock-down date.  $t_{\text{eff}}$ : effective lock-down date.

Table S2: Parameters from fitting Equation (1), to the number of daily deaths data during the exponential growth and exponential decay phases. Parameter values correspond to mean  $\pm$  SE.

| Country | $D_{0_1}$        | $\alpha_1$       | $D_{0_2}$             | $\alpha_2$         |
|---------|------------------|------------------|-----------------------|--------------------|
| ITA     | $9.934 \pm 0.86$ | $0.25 \pm 0.008$ | $2207.08 \pm 75.03$   | $-0.032 \pm 0.001$ |
| ESP     | $9.818 \pm 0.79$ | $0.25 \pm 0.006$ | $2987.16 \pm 321.018$ | $-0.046 \pm 0.003$ |
| FRA     | $6.95 \pm 0.50$  | $0.22 \pm 0.006$ | $6970.80 \pm 388.52$  | $-0.058 \pm 0.001$ |
| GBR     | $8.59 \pm 0.81$  | $0.22 \pm 0.006$ | $2739.04 \pm 89.85$   | $-0.030 \pm 0.001$ |
| GER     | $7.32 \pm 0.47$  | $0.20 \pm 0.006$ | $1089.01 \pm 48.01$   | $-0.046 \pm 0.001$ |
| BEL     | $9.97 \pm 0.61$  | $0.20 \pm 0.006$ | $1433.01 \pm 69.99$   | $-0.056 \pm 0.001$ |
| NLD     | $7.28 \pm 0.31$  | $0.22 \pm 0.004$ | $851.46 \pm 49.79$    | $-0.052 \pm 0.001$ |
| SWL     | $5.25 \pm 0.46$  | $0.19 \pm 0.010$ | $321.90 \pm 25.24$    | $-0.064 \pm 0.002$ |
| SWE     | $10.53 \pm 0.61$ | $0.14 \pm 0.006$ | $151.46 \pm 11.16$    | $-0.018 \pm 0.001$ |

Table S3: Parameters from fitting Equation (3) to the mobility data over a period of 90 days starting from 13-January-2020. Parameter values correspond to mean  $\pm$  SE.

| Country | $M_1$             | $t_1$             | $M_2$            | $t_2$             |
|---------|-------------------|-------------------|------------------|-------------------|
| ITA     | $116.07 \pm 1.74$ | $-11.00 \pm 1.03$ | $14.45 \pm 2.08$ | $11.01 \pm 1.06$  |
| ESP     | $123.87 \pm 1.94$ | $-2.75 \pm 0.72$  | $10.80 \pm 2.77$ | $3.51 \pm 0.69$   |
| FRA     | $101.22 \pm 1.24$ | $-1.69 \pm 0.62$  | $16.27 \pm 1.87$ | $4.63 \pm 0.62$   |
| GBR     | $115.37 \pm 1.51$ | $-6.84 \pm 1.09$  | $36.64 \pm 2.51$ | $5.20 \pm 1.05$   |
| GER     | $112.40 \pm 1.30$ | $-13.44 \pm 1.05$ | $46.14 \pm 1.96$ | $-1.21 \pm 1.12$  |
| BEL     | $126.14 \pm 1.74$ | $-13.81 \pm 0.93$ | $39.36 \pm 2.52$ | $-6.37 \pm 0.91$  |
| NLD     | $112.78 \pm 1.22$ | $-11.78 \pm 0.87$ | $39.86 \pm 1.78$ | $-1.40 \pm 0.87$  |
| SWL     | $108.10 \pm 1.00$ | $-15.25 \pm 0.80$ | $44.72 \pm 1.46$ | $-3.28 \pm 0.87$  |
| SWE     | $112.53 \pm 0.95$ | $-21.00 \pm 1.18$ | $70.60 \pm 1.33$ | $-12.06 \pm 1.19$ |

$M_1$ : average mobility level before social distancing.  $t_1$ : when the mobility started to decrease due to social distancing.  $M_2$ : average mobility after the social distancing.  $t_2$ : end of the transition period of social distancing.
